# Supplementary material for: An H3F3A K27M‐mutation in a sonic hedgehog medulloblastoma
Source: PubMed Central journal article supplement — Brain Pathol. 2021 Nov 7;32(3):e13024. doi: 10.1111/bpa.13024 (PMC9048514; doi:10.1111/bpa.13024), 2021-11-07
Supplement: BPA-32-e13024-s001.pdf [file BPA-32-e13024-s001.pdf]

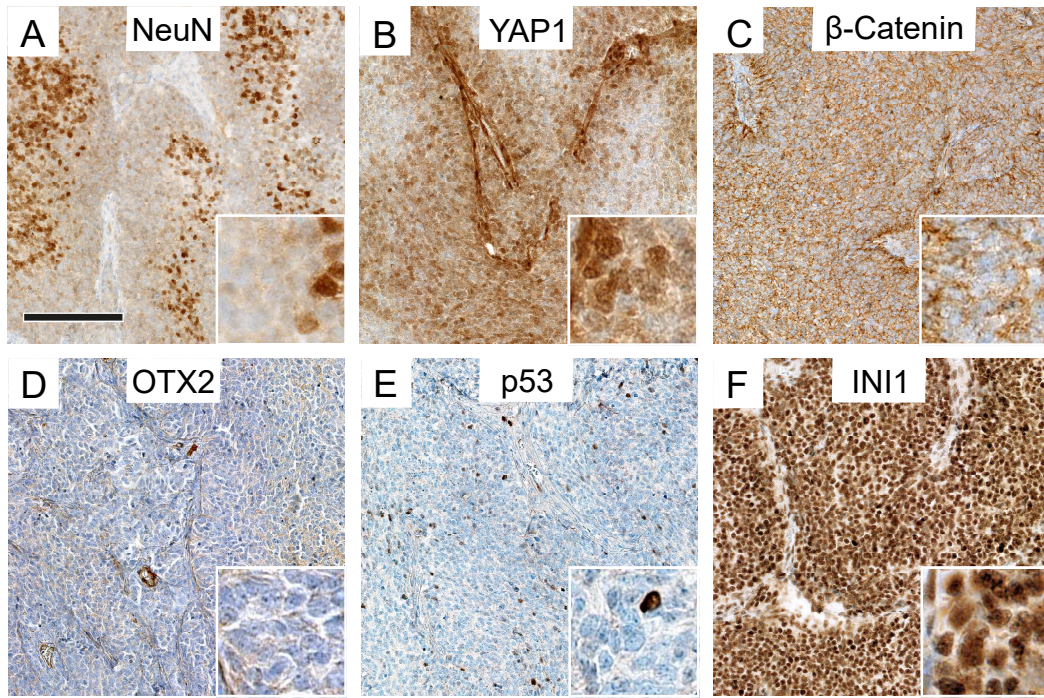

**FIGURE S1** Complementary immunohistochemical stainings. (A) The central parts of the nodules were positive for NeuN. (B) Some cells showed a nuclear expression of YAP1. (C) No nuclear expression of  $\beta$ -Catenin. (D) No expression of OTX2. (E) Only few nuclei stained for p53. (F) Nuclear expression of INI1 retained.

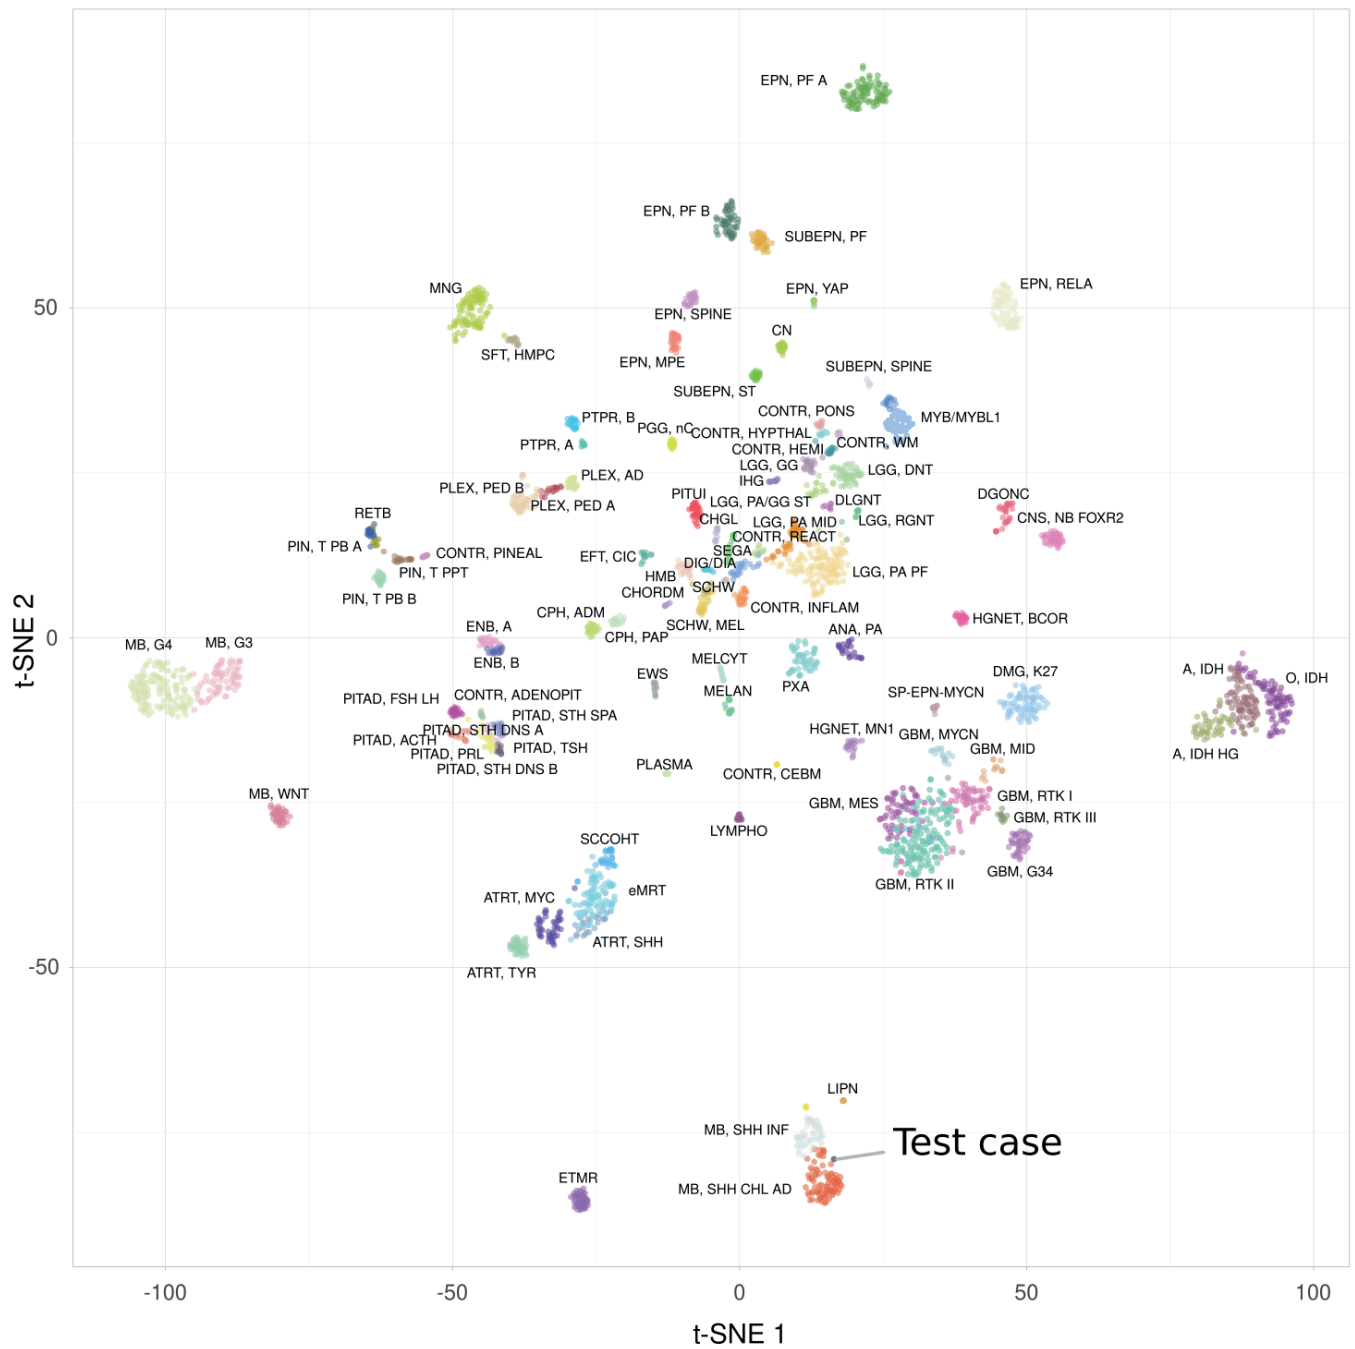

**FIGURE S2** A t-SNE analysis of DNA methylation data from the test case and reference samples from different classes of brain tumour allocates the test case to SHH-medulloblastoma (non-trivial PCs 101, perplexity 55).

**"An H3F3A K27M-mutation in a sonic hedgehog medulloblastoma"**

Brain Pathology, Dottermusch M et al.

Corresponding author: Dr. Annika K. Wefers, a.wefers@uke.de, Institute of Neuropathology, University Medical Center Hamburg-Eppendorf, Germany
